# Supplementary material for: Disentangling the effects of traits with shared clustered genetic predictors using multivariable Mendelian randomization
Source: PubMed Central journal article supplement (PMC9541575; doi:10.1002/gepi.22462), 2022-05-31
Supplement: GEPI-46-415-s001.pdf [file GEPI-46-415-s001.pdf]

# Supplementary Material

## A.1 Software code for MV-IVW and MV-IVW-PCA methods

We provide R code to implement the MV-IVW and MV-IVW-PCA methods with three exposure traits. Genetic associations with the exposure are denoted `beta_x1`, `beta_x2`, and `beta_x3`, and their standard errors `se_x1`, `se_x2`, and `se_x3`. Genetic associations with the outcome are denoted `beta_y` and their standard errors `se_y`. The variant correlation matrix is denoted `rho`. Code is supplied both using the *MendelianRandomization* package, and using matrix calculations directly:

```
# MV-IVW method
#####
# note use of fixed-effect model under assumption that all variants in same
# genetic region and hence influence the outcome through same causal pathway

library(MendelianRandomization)
mvivw = mr_mvivw(mr_mvinput(cbind(beta_x1, beta_x2, beta_x3),
  cbind(se_x1, se_x2, se_x3), beta_y, se_y, correl=rho), model="fixed")
mvivw$Estimate; mvivw$StdError

beta_x = cbind(beta_x1, beta_x2, beta_x3)
Sigma = se_y%o%se_y*rho
mvivw_est = solve(t(beta_x)%*%solve(Sigma)%*%beta_x)%*%t(beta_x)%*%solve(Sigma)%*%beta_y
mvivw_se = sqrt(diag(solve(t(beta_x)%*%solve(Sigma)%*%beta_x)))

# MV-PCA method
#####

Psi = ((abs(beta_x1)+abs(beta_x2)+abs(beta_x3))/se_y)%o%
  ((abs(beta_x1)+abs(beta_x2)+abs(beta_x3))/se_y)*rho
K = which(cumsum(prcomp(Psi, scale=FALSE)$sdev^2/
  sum((prcomp(Psi, scale=FALSE)$sdev^2)))>0.99)[1]
# K is number of principal components to include in analysis
# this code includes principal components to explain 99% of variance in the risk factor
betaXG1 = as.numeric(beta_x1)%*%prcomp(Psi, scale=FALSE)$rotation[,1:K]
betaXG2 = as.numeric(beta_x2)%*%prcomp(Psi, scale=FALSE)$rotation[,1:K]
betaXG3 = as.numeric(beta_x3)%*%prcomp(Psi, scale=FALSE)$rotation[,1:K]
betaYG0 = as.numeric(beta_y)%*%prcomp(Psi, scale=FALSE)$rotation[,1:K]
sebetaYG0 = as.numeric(se_y)%*%prcomp(Psi, scale=FALSE)$rotation[,1:K]
Sigma = se_y%o%se_y*rho
pcSigma = t(prcomp(Psi, scale=FALSE)$rotation[,1:K])%*%Sigma%*%
  prcomp(Psi, scale=FALSE)$rotation[,1:K]

mvpca = mr_mvivw(mr_mvinput(cbind(betaXG1, betaXG2, betaXG3),
  cbind(rep(1, length(betaXG1)), rep(1, length(betaXG1)), rep(1, length(betaXG1))),
  betaYG0, rep(1, length(betaXG1)), corr=pcSigma), model="fixed")
mvpca$Estimate; mvpca$StdError
# note that the standard errors of the genetic associations with the exposures are
# not used in the calculation, and so are set to 1

mvpca_est = solve(rbind(betaXG1, betaXG2, betaXG3)%*%solve(pcSigma)%*%
  cbind(betaXG1, betaXG2, betaXG3))%*%
  rbind(betaXG1, betaXG2, betaXG3)%*%solve(pcSigma)%*%betaYG0
mvpca_se = sqrt(diag(solve(rbind(betaXG1, betaXG2, betaXG3)%*%solve(pcSigma)%*%
  cbind(betaXG1, betaXG2, betaXG3))))
```

## A.2 Software code for MV-LIML and MV-LIML-PCA methods

We provide R code to implement the MV-LIML and MV-LIML-PCA methods. The matrix of genetic associations with the exposure is denoted  $Bx$ , and standard errors  $Sx$ . The vector of genetic associations with the outcome is denoted  $By$  and standard errors  $Sy$ . The variant correlation matrix is denoted  $\rho$ , the trait correlation matrix is denoted  $\Phi$ , and the number of principal components  $R$ ; this can be provided by the user, or estimated automatically:

```
# MV-LIML method
#####

mvmr_liml <- function(Bx,By,Sx,Sy,rho,Phi) {
  Bx <- as.matrix(Bx); By <- as.vector(By)
  Sx <- as.matrix(Sx); Sy <- as.vector(Sy)
  rho <- as.matrix(rho); Phi <- as.matrix(Phi)
  J <- ncol(Bx); K <- nrow(Bx)

  GamY <- (Sy%*%t(Sy))*rho

  gamX <- list()
  for (k in 1:J){
    gamX[[k]] <- (Sx[,k]%*%t(Sx[,k]))
  }

  GamX1 <- function(tet){
    gamX.t <- list()
    for (k in 1:J){
      for (l in 1:J){
        gamX.t[(((k-1)*J)+l)] <- sqrt(gamX[[k]])*sqrt(gamX[[l]])*rho*tet[k]*tet[l]*Phi[k,l]
      }
    }
    return(gamX.t)
  }

  GamX <- function(tet){Reduce('+',GamX1(tet))}

# LIML estimation
g <- function(tet){as.vector(By - (Bx%*%tet))}
Om <- function(tet){as.matrix(GamY + GamX(tet))}
Q <- function(tet){as.numeric(t(g(tet))%*(solve(Om(tet)))%*g(tet))}
G <- -as.matrix(Bx)
DQ <- function(tet){2*as.matrix(t(G)%*(solve(Om(tet)))%*g(tet))}
liml <- nlminb(rep(0,J),objective=Q,gradient=DQ)
est <- as.vector(liml$par)
var.est <- as.matrix(solve(t(G)%*(solve(Om(est)))%*G))

res.list <- list("est"=est, "var"=var.est)
return(res.list)
}
```

```

# MV-PCA-LIML method
#####

mv_pca_liml <- function(Bx,By,Sx,Sy,rho,Phi,R=NULL) {
  Bx <- as.matrix(Bx); By <- as.vector(By)
  Sx <- as.matrix(Sx); Sy <- as.vector(Sy)
  rho <- as.matrix(rho); Phi <- as.matrix(Phi)
  J <- ncol(Bx); K <- nrow(Bx)
  Psi = (rowSums(abs(Bx))/Sy)%o%(rowSums(abs(Bx))/Sy)*rho

  # estimate number of principal components
  if(missing(R)) {
    R=which(cumsum(prcomp(Psi,scale=FALSE)$sdev^2/sum((prcomp(Psi,scale=FALSE)$sdev^2))>0.99)[1]
  } else { R=R }
  lambda <- sqrt(K)*(eigen(Psi)$vectors[,1:R])
  evec <- eigen((t(lambda)%*%lambda))$vectors
  eval <- eigen((t(lambda)%*%lambda))$values
  lambda <- lambda%*%(solve(evec%*%diag(sqrt(eval))%*%t(evec)))
  dim(lambda) <- c(K,R)

  GamY <- (Sy%*%t(Sy))*rho

  gamX <- list()
  for (k in 1:J){
    gamX[[k]] <- (Sx[,k]%*%t(Sx[,k]))
  }

  GamX1 <- function(tet){
    gamX.t <- list()
    for (k in 1:J){
      for (l in 1:J){
        gamX.t[(((k-1)*J)+l)] <- sqrt(gamX[[k]])*sqrt(gamX[[l]])*rho*tet[k]*tet[l]*Phi[k,l]
      }
    }
    return(gamX.t)
  }

  GamX <- function(tet){Reduce('+',GamX1(tet))}

  # LIML estimation
  g <- function(tet){as.vector(t(lambda)%*%(By - (Bx%*%tet)))}
  Om <- function(tet){as.matrix(t(lambda)%*%(GamY + GamX(tet))%*%lambda)}
  Q <- function(tet){as.numeric(t(g(tet))%*%(solve(Om(tet))%*%g(tet)))}
  G <- -as.matrix(t(lambda)%*%Bx)
  DQ <- function(tet){2*as.matrix(t(G)%*%(solve(Om(tet))%*%g(tet)))}
  liml <- nlm(bf=Q,rep(0,J),objective=Q,gradient=DQ)
  est <- as.vector(liml$par)
  var.est <- as.matrix(solve(t(G)%*%(solve(Om(est))%*%G))

  res.list <- list("est"=est, "var"=var.est)
  return(res.list)
}

```

### A.3 Additional simulation results

In addition to the main simulation study, we also consider the performance of the MV-IVW-PCA and MV-LIML-PCA methods with other parameter settings:

- Supplementary Table A1. Weaker instruments: we generate the  $\alpha_j$  parameters from a normal distribution with mean 0.5.
- Supplementary Table A2. Stronger correlations: we generate elements of the  $A$  matrix from a uniform distribution on +0.1 to +1.0. Note that as the vast majority of correlations between variants were above +0.6, we did not attempt the methods that rely on pruning in this scenario.
- Supplementary Table A3. Stronger effects: we set  $\theta_1 = +0.8$  and  $\theta_3 = +1.0$ .
- Supplementary Table A4. Alternative approach for generating a correlation matrix 1: the “c-vine” method from the R package *clusterGeneration*. The code is:
 

```
sig <- cor(genPositiveDefMat(dim=vars, covMethod = "c-vine",
                             eigenvalue=runif(vars, -1, 1))$Sigma).
```

 Correlations typically ranged from around  $-0.5$  to  $+0.5$  with an interquartile range from around  $-0.1$  to  $+0.1$ .
- Supplementary Table A5. Alternative approach for generating a correlation matrix 2: the “onion” method from the R package *clusterGeneration*. The code is:
 

```
sig <- cor(genPositiveDefMat(dim=vars, covMethod = "onion",
                             eigenvalue=runif(vars, -1, 1))$Sigma)
```

 Correlations typically ranged from around  $-0.5$  to  $+0.5$  with an interquartile range from around  $-0.1$  to  $+0.1$ .
- Supplementary Table A6. Correlations were obtained from data on participants of European ancestries from UK Biobank. After pruning at a threshold of  $r^2 < 0.95$ , we took correlations from the first 100 variants in the chemokine receptor gene cluster considered in the applied analysis.
- Supplementary Table A7. Exposure traits were correlated by adding an additional term  $U_{i2}$  to the equation for the generation of  $X_{i1}$  to read  $X_{i1} = \sum_{j=1}^5 \alpha_j G_{ij} + U_{i1} + U_{i2} + \epsilon_{X_{i1}}$ . Similarly, we added  $U_{i3}$  to  $X_2$ , and  $U_{i1}$  to  $X_3$ . This correlation was not accounted for in the MV-LIML method.
- Supplementary Table A8. Exposure traits were correlated as in the previous scenario, except that the equation for the generation of  $X_{i1}$  read  $X_{i1} = \sum_{j=1}^5 \alpha_j G_{ij} + U_{i1}/\sqrt{2} + U_{i2}/\sqrt{2} + \epsilon_{X_{i1}} \times \sqrt{2}$ , and similarly for  $X_2$  and  $X_3$ . This ensures that the variances of  $X_1$ ,  $X_2$ , and  $X_3$  remained the same as in the previous scenario, but correlations between the exposures were weaker.
- Supplementary Table A9. Exposure traits were correlated as in the previous two scenarios, except that the equation for the generation of  $X_{i1}$  read  $X_{i1} = \sum_{j=1}^5 \alpha_j G_{ij} + U_{i1} \times \sqrt{1.4} + U_{i2} \times \sqrt{1.4} + \epsilon_{X_{i1}} \times \sqrt{0.2}$ , and similarly for  $X_2$  and  $X_3$ . This ensures that the variances of  $X_1, X_2$ , and  $X_3$  remained the same as in the previous two scenarios, but correlations between the exposures were stronger.

- Supplementary Table A10. Smaller independent sample for variant correlation matrix: the correlation matrix between genetic variants is estimates based on an independent sample of 1000 individuals.

In each setting, the proposed PCA methods performed well, with close to nominal Type 1 error rates in most scenarios and greater power than for the MV-IVW and MV-LIML methods at pruning thresholds where those methods maintained reasonable Type 1 error rates.

Supplementary Table A1: Results from simulation study with weaker instruments

| Parameter   | Method      | Pruning | Mean   | SD     | Mean SE | Power |      |
|-------------|-------------|---------|--------|--------|---------|-------|------|
| $\theta_1$  | MV-IVW      | Oracle  | 0.297  | 0.196  | 0.180   | 39.2  |      |
|             |             | 0.4     | 0.215  | 0.225  | 0.204   | 22.3  |      |
|             |             | 0.6     | 0.119  | 0.132  | 0.119   | 20.5  |      |
|             |             | 0.8     | -0.050 | 0.505  | 0.066   | 71.9  |      |
|             | MV-LIML     | Oracle  | 0.349  | 0.237  | 0.201   | 43.0  |      |
|             |             | 0.4     | 0.276  | 0.312  | 0.229   | 28.8  |      |
|             |             | 0.6     | 0.215  | 0.266  | 0.128   | 42.5  |      |
|             |             | 0.8     | 0.106  | 2.425  | 0.234   | 75.2  |      |
|             | MV-IVW-PCA  | -       | 0.208  | 0.176  | 0.164   | 26.5  |      |
|             | MV-LIML-PCA | -       | 0.296  | 0.262  | 0.182   | 41.2  |      |
|             | $\theta_2$  | MV-IVW  | Oracle | -0.012 | 0.197   | 0.180 | 6.9  |
|             |             |         | 0.4    | -0.022 | 0.228   | 0.205 | 7.0  |
| 0.6         |             |         | -0.012 | 0.134  | 0.119   | 8.0   |      |
| 0.8         |             |         | -0.043 | 0.499  | 0.065   | 72.0  |      |
| MV-LIML     |             | Oracle  | -0.006 | 0.238  | 0.201   | 7.5   |      |
|             |             | 0.4     | -0.015 | 0.315  | 0.230   | 9.9   |      |
|             |             | 0.6     | -0.002 | 0.274  | 0.128   | 22.4  |      |
|             |             | 0.8     | 0.015  | 2.437  | 0.234   | 75.4  |      |
| MV-IVW-PCA  |             | -       | -0.023 | 0.176  | 0.164   | 6.7   |      |
| MV-LIML-PCA |             | -       | -0.014 | 0.264  | 0.182   | 13.9  |      |
| $\theta_3$  |             | MV-IVW  | Oracle | -0.478 | 0.196   | 0.180 | 75.4 |
|             |             |         | 0.4    | -0.381 | 0.233   | 0.206 | 50.3 |
|             | 0.6         |         | -0.204 | 0.148  | 0.119   | 44.3  |      |
|             | 0.8         |         | -0.181 | 0.500  | 0.066   | 72.8  |      |
|             | MV-LIML     | Oracle  | -0.539 | 0.233  | 0.202   | 78.2  |      |
|             |             | 0.4     | -0.455 | 0.317  | 0.231   | 56.5  |      |
|             |             | 0.6     | -0.326 | 0.275  | 0.128   | 64.4  |      |
|             |             | 0.8     | -0.012 | 2.283  | 0.233   | 74.7  |      |
|             | MV-IVW-PCA  | -       | -0.368 | 0.179  | 0.165   | 61.3  |      |
|             | MV-LIML-PCA | -       | -0.475 | 0.263  | 0.182   | 72.3  |      |

Mean estimates, standard deviation (SD) of estimates, mean standard error (mean SE) of estimates, and empirical power of the 95% confidence interval to estimate  $\theta_1 = 0.4$ ,  $\theta_2 = 0$ , and  $\theta_3 = -0.6$ . We consider four methods, and various pruning thresholds for the MV-IVW and MV-LIML methods, plus an oracle setting in which only the 15 variants that truly affect the traits are included in the analysis.

Supplementary Table A2: Results from simulation study with stronger correlations

| Parameter  | Method      | Pruning | Mean   | SD    | Mean SE | Power |
|------------|-------------|---------|--------|-------|---------|-------|
| $\theta_1$ | MV-IVW      | Oracle  | 0.308  | 0.182 | 0.166   | 47.9  |
|            | MV-LIML     | Oracle  | 0.345  | 0.206 | 0.184   | 48.9  |
|            | MV-IVW-PCA  | -       | 0.217  | 0.166 | 0.153   | 32.2  |
|            | MV-LIML-PCA | -       | 0.273  | 0.219 | 0.167   | 39.6  |
| $\theta_2$ | MV-IVW      | Oracle  | -0.014 | 0.182 | 0.166   | 7.2   |
|            | MV-LIML     | Oracle  | -0.009 | 0.209 | 0.185   | 6.8   |
|            | MV-IVW-PCA  | -       | -0.027 | 0.165 | 0.154   | 7.1   |
|            | MV-LIML-PCA | -       | -0.020 | 0.222 | 0.167   | 11.1  |
| $\theta_3$ | MV-IVW      | Oracle  | -0.493 | 0.181 | 0.166   | 82.7  |
|            | MV-LIML     | Oracle  | -0.535 | 0.204 | 0.185   | 84.1  |
|            | MV-IVW-PCA  | -       | -0.387 | 0.167 | 0.154   | 70.7  |
|            | MV-LIML-PCA | -       | -0.452 | 0.223 | 0.168   | 75.6  |

Mean estimates, standard deviation (SD) of estimates, mean standard error (mean SE) of estimates, and empirical power of the 95% confidence interval to estimate  $\theta_1 = 0.4$ ,  $\theta_2 = 0$ , and  $\theta_3 = -0.6$ . Results for different pruning thresholds are omitted as the correlations between variants were typically all above 0.6.

Supplementary Table A3: Results from simulation study with stronger effects

| Parameter   | Method      | Pruning | Mean   | SD    | Mean SE | Power |      |
|-------------|-------------|---------|--------|-------|---------|-------|------|
| $\theta_1$  | MV-IVW      | Oracle  | 0.771  | 0.214 | 0.185   | 96.7  |      |
|             |             | 0.4     | 0.745  | 0.265 | 0.226   | 87.2  |      |
|             |             | 0.6     | 0.441  | 0.341 | 0.144   | 81.1  |      |
|             |             | 0.8     | -0.565 | 0.994 | 0.078   | 88.5  |      |
|             | MV-LIML     | Oracle  | 0.786  | 0.230 | 0.212   | 94.6  |      |
|             |             | 0.4     | 0.767  | 0.312 | 0.261   | 82.5  |      |
|             |             | 0.6     | 0.665  | 1.787 | 0.202   | 81.3  |      |
|             |             | 0.8     | 0.407  | 6.488 | 0.574   | 87.8  |      |
|             | MV-IVW-PCA  | -       | 0.735  | 0.209 | 0.182   | 95.9  |      |
|             | MV-LIML-PCA | -       | 0.772  | 0.257 | 0.209   | 92.0  |      |
|             | $\theta_2$  | MV-IVW  | Oracle | 0.048 | 0.209   | 0.185 | 9.0  |
|             |             |         | 0.4    | 0.108 | 0.265   | 0.227 | 11.5 |
| 0.6         |             |         | 0.015  | 0.295 | 0.144   | 28.0  |      |
| 0.8         |             |         | -0.353 | 1.011 | 0.078   | 86.7  |      |
| MV-LIML     |             | Oracle  | 0.020  | 0.220 | 0.213   | 5.3   |      |
|             |             | 0.4     | 0.061  | 0.306 | 0.263   | 8.0   |      |
|             |             | 0.6     | -0.355 | 1.871 | 0.203   | 46.0  |      |
|             |             | 0.8     | -1.306 | 6.725 | 0.575   | 89.0  |      |
| MV-IVW-PCA  |             | -       | 0.116  | 0.205 | 0.182   | 12.8  |      |
| MV-LIML-PCA |             | -       | 0.047  | 0.236 | 0.209   | 8.2   |      |
| $\theta_3$  |             | MV-IVW  | Oracle | 0.956 | 0.215   | 0.185 | 99.4 |
|             |             |         | 0.4    | 0.904 | 0.269   | 0.228 | 93.4 |
|             | 0.6         |         | 0.542  | 0.357 | 0.144   | 87.0  |      |
|             | 0.8         |         | -0.618 | 0.987 | 0.078   | 87.7  |      |
|             | MV-LIML     | Oracle  | 0.982  | 0.229 | 0.213   | 99.0  |      |
|             |             | 0.4     | 0.947  | 0.319 | 0.263   | 91.4  |      |
|             |             | 0.6     | 0.934  | 1.912 | 0.202   | 89.7  |      |
|             |             | 0.8     | 1.074  | 6.675 | 0.575   | 88.5  |      |
|             | MV-IVW-PCA  | -       | 0.891  | 0.210 | 0.183   | 98.9  |      |
|             | MV-LIML-PCA | -       | 0.954  | 0.251 | 0.210   | 97.8  |      |

Mean estimates, standard deviation (SD) of estimates, mean standard error (mean SE) of estimates, and empirical power of the 95% confidence interval to estimate  $\theta_1 = 0.8$ ,  $\theta_2 = 0$ , and  $\theta_3 = 1.0$ . We consider four methods, and various pruning thresholds for the MV-IVW and MV-LIML methods, plus an oracle setting in which only the 15 variants that truly affect the traits are included in the analysis.



Supplementary Table A4: Results from simulation study with alternative correlation matrix (“c-vine”)

| Parameter   | Method      | Pruning | Mean   | SD     | Mean SE | Power |      |
|-------------|-------------|---------|--------|--------|---------|-------|------|
| $\theta_1$  | MV-IVW      | Oracle  | 0.371  | 0.137  | 0.123   | 83.2  |      |
|             |             | 0.4     | 0.274  | 0.114  | 0.104   | 73.1  |      |
|             |             | 0.6     | -0.135 | 0.422  | 0.055   | 75.6  |      |
|             |             | 0.8     | -0.143 | 0.432  | 0.054   | 76.7  |      |
|             | MV-LIML     | Oracle  | 0.386  | 0.144  | 0.137   | 80.9  |      |
|             |             | 0.4     | 0.351  | 0.152  | 0.115   | 80.9  |      |
|             |             | 0.6     | 0.131  | 1.019  | 0.114   | 72.8  |      |
|             |             | 0.8     | 0.131  | 1.035  | 0.115   | 73.5  |      |
|             | MV-IVW-PCA  | -       | 0.334  | 0.135  | 0.122   | 76.2  |      |
|             | MV-LIML-PCA | -       | 0.368  | 0.153  | 0.135   | 76.6  |      |
|             | $\theta_2$  | MV-IVW  | Oracle | 0.002  | 0.135   | 0.123 | 7.3  |
|             |             |         | 0.4    | 0.002  | 0.113   | 0.104 | 6.9  |
| 0.6         |             |         | 0.006  | 0.414  | 0.055   | 74.4  |      |
| 0.8         |             |         | 0.005  | 0.423  | 0.054   | 75.5  |      |
| MV-LIML     |             | Oracle  | 0.001  | 0.143  | 0.137   | 5.6   |      |
|             |             | 0.4     | 0.001  | 0.154  | 0.115   | 13.5  |      |
|             |             | 0.6     | 0.002  | 1.056  | 0.114   | 71.7  |      |
|             |             | 0.8     | 0.007  | 1.104  | 0.115   | 71.9  |      |
| MV-IVW-PCA  |             | -       | 0.001  | 0.134  | 0.122   | 6.8   |      |
| MV-LIML-PCA |             | -       | 0.000  | 0.153  | 0.135   | 7.6   |      |
| $\theta_3$  |             | MV-IVW  | Oracle | -0.558 | 0.136   | 0.123 | 98.8 |
|             |             |         | 0.4    | -0.411 | 0.115   | 0.104 | 95.4 |
|             | 0.6         |         | 0.212  | 0.419  | 0.055   | 77.9  |      |
|             | 0.8         |         | -0.226 | 0.427  | 0.054   | 79.2  |      |
|             | MV-LIML     | Oracle  | -0.581 | 0.141  | 0.136   | 98.7  |      |
|             |             | 0.4     | -0.529 | 0.146  | 0.115   | 97.6  |      |
|             |             | 0.6     | -0.186 | 0.934  | 0.113   | 75.2  |      |
|             |             | 0.8     | -0.190 | 0.970  | 0.115   | 75.5  |      |
|             | MV-IVW-PCA  | -       | -0.502 | 0.134  | 0.122   | 96.6  |      |
|             | MV-LIML-PCA | -       | -0.555 | 0.147  | 0.135   | 97.1  |      |

Mean estimates, standard deviation (SD) of estimates, mean standard error (mean SE) of estimates, and empirical power of the 95% confidence interval to estimate  $\theta_1 = 0.4$ ,  $\theta_2 = 0$ , and  $\theta_3 = -0.6$ . We consider four methods, and various pruning thresholds for the MV-IVW and MV-LIML methods, plus an oracle setting in which only the 15 variants that truly affect the traits are included in the analysis.

Supplementary Table A5: Results from simulation study with alternative correlation matrix (“onion”)

| Parameter   | Method      | Pruning | Mean   | SD     | Mean SE | Power |      |
|-------------|-------------|---------|--------|--------|---------|-------|------|
| $\theta_1$  | MV-IVW      | Oracle  | 0.374  | 0.136  | 0.123   | 83.6  |      |
|             |             | 0.4     | 0.276  | 0.114  | 0.105   | 73.6  |      |
|             |             | 0.6     | -0.137 | 0.421  | 0.055   | 75.8  |      |
|             |             | 0.8     | -0.146 | 0.434  | 0.054   | 77.2  |      |
|             | MV-LIML     | Oracle  | 0.390  | 0.142  | 0.137   | 81.5  |      |
|             |             | 0.4     | 0.354  | 0.151  | 0.115   | 81.5  |      |
|             |             | 0.6     | 0.127  | 1.015  | 0.114   | 73.8  |      |
|             |             | 0.8     | 0.127  | 1.054  | 0.115   | 74.5  |      |
|             | MV-IVW-PCA  | -       | 0.336  | 0.134  | 0.122   | 76.5  |      |
|             | MV-LIML-PCA | -       | 0.370  | 0.151  | 0.135   | 77.5  |      |
|             | $\theta_2$  | MV-IVW  | Oracle | -0.000 | 0.137   | 0.123 | 7.8  |
|             |             |         | 0.4    | -0.000 | 0.115   | 0.104 | 7.5  |
| 0.6         |             |         | -0.000 | 0.412  | 0.055   | 74.7  |      |
| 0.8         |             |         | -0.002 | 0.423  | 0.053   | 75.9  |      |
| MV-LIML     |             | Oracle  | -0.001 | 0.145  | 0.137   | 6.0   |      |
|             |             | 0.4     | -0.001 | 0.159  | 0.115   | 14.6  |      |
|             |             | 0.6     | 0.004  | 1.007  | 0.113   | 72.0  |      |
|             |             | 0.8     | 0.005  | 1.036  | 0.115   | 72.8  |      |
| MV-IVW-PCA  |             | -       | -0.000 | 0.137  | 0.122   | 7.6   |      |
| MV-LIML-PCA |             | -       | -0.001 | 0.158  | 0.135   | 8.5   |      |
| $\theta_3$  |             | MV-IVW  | Oracle | -0.556 | 0.134   | 0.123 | 98.7 |
|             |             |         | 0.4    | -0.412 | 0.114   | 0.104 | 95.5 |
|             | 0.6         |         | 0.212  | 0.431  | 0.055   | 78.0  |      |
|             | 0.8         |         | 0.225  | 0.441  | 0.053   | 79.3  |      |
|             | MV-LIML     | Oracle  | -0.584 | 0.139  | 0.137   | 98.7  |      |
|             |             | 0.4     | -0.531 | 0.146  | 0.115   | 97.7  |      |
|             |             | 0.6     | -0.189 | 0.897  | 0.113   | 75.2  |      |
|             |             | 0.8     | -0.186 | 0.935  | 0.115   | 75.7  |      |
|             | MV-IVW-PCA  | -       | -0.503 | 0.133  | 0.122   | 96.6  |      |
|             | MV-LIML-PCA | -       | -0.556 | 0.146  | 0.135   | 97.2  |      |

Mean estimates, standard deviation (SD) of estimates, mean standard error (mean SE) of estimates, and empirical power of the 95% confidence interval to estimate  $\theta_1 = 0.4$ ,  $\theta_2 = 0$ , and  $\theta_3 = -0.6$ . We consider four methods, and various pruning thresholds for the MV-IVW and MV-LIML methods, plus an oracle setting in which only the 15 variants that truly affect the traits are included in the analysis.

Supplementary Table A6: Results from simulation study with variant correlations taken from real genetic data.

| Parameter  | Method      | Pruning | Mean   | SD    | Mean SE | Power |
|------------|-------------|---------|--------|-------|---------|-------|
| $\theta_1$ | MV-IVW      | Oracle  | 0.361  | 0.135 | 0.123   | 81.9  |
|            |             | 0.4     | 0.301  | 0.134 | 0.124   | 67.7  |
|            |             | 0.6     | 0.273  | 0.120 | 0.113   | 67.1  |
|            |             | 0.8     | 0.242  | 0.113 | 0.106   | 63.0  |
|            | MV-LIML     | Oracle  | 0.382  | 0.143 | 0.137   | 81.0  |
|            |             | 0.4     | 0.349  | 0.159 | 0.136   | 72.1  |
|            |             | 0.6     | 0.341  | 0.155 | 0.123   | 75.7  |
|            |             | 0.8     | 0.327  | 0.160 | 0.115   | 75.0  |
|            | MV-IVW-PCA  | -       | 0.335  | 0.148 | 0.137   | 68.4  |
|            | MV-LIML-PCA | -       | 0.366  | 0.164 | 0.151   | 69.1  |
| $\theta_2$ | MV-IVW      | Oracle  | 0.014  | 0.127 | 0.116   | 7.4   |
|            |             | 0.4     | 0.036  | 0.123 | 0.115   | 7.9   |
|            |             | 0.6     | 0.044  | 0.115 | 0.108   | 8.3   |
|            |             | 0.8     | 0.047  | 0.106 | 0.100   | 9.0   |
|            | MV-LIML     | Oracle  | 0.005  | 0.136 | 0.129   | 6.1   |
|            |             | 0.4     | 0.019  | 0.147 | 0.126   | 8.9   |
|            |             | 0.6     | 0.027  | 0.153 | 0.118   | 12.7  |
|            |             | 0.8     | 0.031  | 0.155 | 0.109   | 17.1  |
|            | MV-IVW-PCA  | -       | 0.022  | 0.134 | 0.122   | 7.3   |
|            | MV-LIML-PCA | -       | 0.008  | 0.145 | 0.135   | 6.2   |
| $\theta_3$ | MV-IVW      | Oracle  | -0.557 | 0.122 | 0.112   | 99.7  |
|            |             | 0.4     | -0.488 | 0.118 | 0.110   | 99.0  |
|            |             | 0.6     | -0.454 | 0.110 | 0.103   | 99.0  |
|            |             | 0.8     | -0.417 | 0.103 | 0.097   | 98.7  |
|            | MV-LIML     | Oracle  | -0.578 | 0.126 | 0.124   | 99.8  |
|            |             | 0.4     | -0.533 | 0.132 | 0.121   | 99.2  |
|            |             | 0.6     | -0.523 | 0.128 | 0.113   | 99.3  |
|            |             | 0.8     | -0.512 | 0.126 | 0.106   | 99.2  |
|            | MV-IVW-PCA  | -       | -0.539 | 0.126 | 0.117   | 99.5  |
|            | MV-LIML-PCA | -       | -0.565 | 0.135 | 0.129   | 99.5  |

Mean estimates, standard deviation (SD) of estimates, mean standard error (mean SE) of estimates, and empirical power of the 95% confidence interval to estimate  $\theta_1 = 0.4$ ,  $\theta_2 = 0$ , and  $\theta_3 = -0.6$ . We consider four methods, and various pruning thresholds for the MV-IVW and MV-LIML methods, plus an oracle setting in which only the 15 variants that truly affect the traits are included in the analysis.

Supplementary Table A7: Results from simulation study with **moderately** correlated exposures.

| Parameter  | Method      | Pruning | Mean   | SD    | Mean SE | Power |
|------------|-------------|---------|--------|-------|---------|-------|
| $\theta_1$ | MV-IVW      | Oracle  | 0.354  | 0.128 | 0.115   | 84.6  |
|            |             | 0.4     | 0.305  | 0.160 | 0.142   | 60.3  |
|            |             | 0.6     | 0.210  | 0.113 | 0.090   | 64.7  |
|            |             | 0.8     | -0.085 | 0.411 | 0.049   | 77.0  |
|            | MV-LIML     | Oracle  | 0.391  | 0.145 | 0.136   | 84.0  |
|            |             | 0.4     | 0.361  | 0.198 | 0.167   | 62.3  |
|            |             | 0.6     | 0.398  | 0.385 | 0.111   | 82.0  |
|            |             | 0.8     | 0.113  | 3.199 | 0.290   | 80.8  |
|            | MV-IVW-PCA  | -       | 0.299  | 0.125 | 0.114   | 73.2  |
|            | MV-LIML-PCA | -       | 0.381  | 0.168 | 0.134   | 79.8  |
| $\theta_2$ | MV-IVW      | Oracle  | -0.003 | 0.129 | 0.115   | 7.8   |
|            |             | 0.4     | -0.009 | 0.162 | 0.142   | 7.3   |
|            |             | 0.6     | 0.002  | 0.107 | 0.090   | 9.1   |
|            |             | 0.8     | 0.035  | 0.409 | 0.049   | 75.8  |
|            | MV-LIML     | Oracle  | 0.001  | 0.143 | 0.136   | 5.5   |
|            |             | 0.4     | -0.003 | 0.205 | 0.168   | 7.2   |
|            |             | 0.6     | 0.016  | 0.368 | 0.110   | 28.5  |
|            |             | 0.8     | 0.011  | 3.264 | 0.291   | 80.9  |
|            | MV-IVW-PCA  | -       | -0.009 | 0.125 | 0.113   | 7.5   |
|            | MV-LIML-PCA | -       | 0.000  | 0.173 | 0.134   | 10.3  |
| $\theta_3$ | MV-IVW      | Oracle  | -0.544 | 0.128 | 0.115   | 99.0  |
|            |             | 0.4     | -0.484 | 0.161 | 0.142   | 89.3  |
|            |             | 0.6     | -0.310 | 0.136 | 0.090   | 88.2  |
|            |             | 0.8     | 0.221  | 0.410 | 0.049   | 78.5  |
|            | MV-LIML     | Oracle  | -0.587 | 0.140 | 0.136   | 99.0  |
|            |             | 0.4     | -0.550 | 0.201 | 0.168   | 90.4  |
|            |             | 0.6     | -0.540 | 0.355 | 0.111   | 94.8  |
|            |             | 0.8     | -0.071 | 3.047 | 0.290   | 80.8  |
|            | MV-IVW-PCA  | -       | -0.474 | 0.126 | 0.114   | 96.7  |
|            | MV-LIML-PCA | -       | -0.570 | 0.165 | 0.135   | 97.8  |

Mean estimates, standard deviation (SD) of estimates, mean standard error (mean SE) of estimates, and empirical power of the 95% confidence interval to estimate  $\theta_1 = 0.4$ ,  $\theta_2 = 0$ , and  $\theta_3 = -0.6$ . We consider four methods, and various pruning thresholds for the MV-IVW and MV-LIML methods, plus an oracle setting in which only the 15 variants that truly affect the traits are included in the analysis.

Supplementary Table A8: Results from simulation study with **weakly** correlated exposures.

| Parameter  | Method      | Pruning | Mean   | SD    | Mean SE | Power |
|------------|-------------|---------|--------|-------|---------|-------|
| $\theta_1$ | MV-IVW      | Oracle  | 0.344  | 0.135 | 0.120   | 79.3  |
|            |             | 0.4     | 0.286  | 0.163 | 0.145   | 53.7  |
|            |             | 0.6     | 0.186  | 0.112 | 0.090   | 55.1  |
|            |             | 0.8     | -0.081 | 0.408 | 0.049   | 75.7  |
|            | MV-LIML     | Oracle  | 0.381  | 0.150 | 0.140   | 79.3  |
|            |             | 0.4     | 0.340  | 0.207 | 0.168   | 56.7  |
|            |             | 0.6     | 0.327  | 0.281 | 0.105   | 74.3  |
|            |             | 0.8     | 0.070  | 2.896 | 0.251   | 80.8  |
|            | MV-IVW-PCA  | -       | 0.279  | 0.129 | 0.117   | 66.0  |
|            | MV-LIML-PCA | -       | 0.356  | 0.173 | 0.135   | 74.1  |
| $\theta_2$ | MV-IVW      | Oracle  | -0.005 | 0.135 | 0.120   | 7.9   |
|            |             | 0.4     | -0.013 | 0.165 | 0.145   | 7.4   |
|            |             | 0.6     | -0.002 | 0.108 | 0.090   | 9.3   |
|            |             | 0.8     | 0.039  | 0.404 | 0.049   | 74.7  |
|            | MV-LIML     | Oracle  | -0.001 | 0.153 | 0.139   | 6.2   |
|            |             | 0.4     | -0.007 | 0.209 | 0.168   | 7.9   |
|            |             | 0.6     | 0.010  | 0.291 | 0.105   | 26.4  |
|            |             | 0.8     | 0.054  | 3.006 | 0.252   | 79.0  |
|            | MV-IVW-PCA  | -       | -0.013 | 0.129 | 0.117   | 7.6   |
|            | MV-LIML-PCA | -       | -0.004 | 0.174 | 0.135   | 10.9  |
| $\theta_3$ | MV-IVW      | Oracle  | -0.533 | 0.134 | 0.120   | 98.3  |
|            |             | 0.4     | -0.463 | 0.166 | 0.146   | 85.6  |
|            |             | 0.6     | -0.286 | 0.133 | 0.090   | 83.8  |
|            |             | 0.8     | 0.216  | 0.408 | 0.049   | 78.0  |
|            | MV-LIML     | Oracle  | -0.575 | 0.147 | 0.140   | 98.3  |
|            |             | 0.4     | -0.526 | 0.206 | 0.169   | 87.2  |
|            |             | 0.6     | -0.463 | 0.325 | 0.105   | 92.1  |
|            |             | 0.8     | -0.056 | 2.827 | 0.251   | 80.7  |
|            | MV-IVW-PCA  | -       | -0.452 | 0.130 | 0.117   | 94.7  |
|            | MV-LIML-PCA | -       | -0.543 | 0.168 | 0.135   | 96.6  |

Mean estimates, standard deviation (SD) of estimates, mean standard error (mean SE) of estimates, and empirical power of the 95% confidence interval to estimate  $\theta_1 = 0.4$ ,  $\theta_2 = 0$ , and  $\theta_3 = -0.6$ . We consider four methods, and various pruning thresholds for the MV-IVW and MV-LIML methods, plus an oracle setting in which only the 15 variants that truly affect the traits are included in the analysis.

Supplementary Table A9: Results from simulation study with **strongly** correlated exposures.

| Parameter  | Method      | Pruning | Mean   | SD    | Mean SE | Power |
|------------|-------------|---------|--------|-------|---------|-------|
| $\theta_1$ | MV-IVW      | Oracle  | 0.363  | 0.123 | 0.111   | 88.5  |
|            |             | 0.4     | 0.321  | 0.155 | 0.139   | 65.8  |
|            |             | 0.6     | 0.233  | 0.114 | 0.089   | 72.8  |
|            |             | 0.8     | -0.089 | 0.398 | 0.049   | 77.1  |
|            | MV-LIML     | Oracle  | 0.399  | 0.135 | 0.134   | 87.0  |
|            |             | 0.4     | 0.380  | 0.196 | 0.167   | 66.4  |
|            |             | 0.6     | 0.463  | 0.508 | 0.118   | 87.5  |
|            |             | 0.8     | 0.163  | 3.379 | 0.320   | 82.0  |
|            | MV-IVW-PCA  | -       | 0.317  | 0.122 | 0.112   | 79.4  |
|            | MV-LIML-PCA | -       | 0.402  | 0.164 | 0.135   | 84.2  |
| $\theta_2$ | MV-IVW      | Oracle  | -0.002 | 0.123 | 0.111   | 7.4   |
|            |             | 0.4     | -0.007 | 0.158 | 0.139   | 7.3   |
|            |             | 0.6     | 0.005  | 0.108 | 0.089   | 9.6   |
|            |             | 0.8     | 0.032  | 0.397 | 0.049   | 76.5  |
|            | MV-LIML     | Oracle  | 0.003  | 0.138 | 0.134   | 5.1   |
|            |             | 0.4     | -0.000 | 0.199 | 0.168   | 6.8   |
|            |             | 0.6     | 0.021  | 0.441 | 0.117   | 29.9  |
|            |             | 0.8     | -0.013 | 3.492 | 0.320   | 80.8  |
|            | MV-IVW-PCA  | -       | -0.006 | 0.123 | 0.112   | 7.5   |
|            | MV-LIML-PCA | -       | 0.004  | 0.172 | 0.135   | 10.0  |
| $\theta_3$ | MV-IVW      | Oracle  | -0.553 | 0.124 | 0.112   | 99.4  |
|            |             | 0.4     | -0.501 | 0.159 | 0.139   | 91.3  |
|            |             | 0.6     | -0.334 | 0.140 | 0.090   | 91.4  |
|            |             | 0.8     | 0.227  | 0.409 | 0.049   | 78.5  |
|            | MV-LIML     | Oracle  | -0.596 | 0.134 | 0.134   | 99.5  |
|            |             | 0.4     | -0.569 | 0.200 | 0.168   | 91.9  |
|            |             | 0.6     | -0.609 | 0.423 | 0.118   | 96.5  |
|            |             | 0.8     | -0.134 | 3.207 | 0.319   | 81.9  |
|            | MV-IVW-PCA  | -       | -0.492 | 0.124 | 0.112   | 97.8  |
|            | MV-LIML-PCA | -       | -0.591 | 0.158 | 0.135   | 98.6  |

Mean estimates, standard deviation (SD) of estimates, mean standard error (mean SE) of estimates, and empirical power of the 95% confidence interval to estimate  $\theta_1 = 0.4$ ,  $\theta_2 = 0$ , and  $\theta_3 = -0.6$ . We consider four methods, and various pruning thresholds for the MV-IVW and MV-LIML methods, plus an oracle setting in which only the 15 variants that truly affect the traits are included in the analysis.

Supplementary Table A10: Results from the main simulation study with a correlation matrix estimated in an independent sample of 1000 individuals

| Parameter  | Method      | Pruning | Mean   | SD    | Mean SE | Power |
|------------|-------------|---------|--------|-------|---------|-------|
| $\theta_1$ | MV-IVW      | 0.4     | 0.304  | 0.170 | 0.148   | 56.7  |
|            |             | 0.6     | 0.213  | 0.135 | 0.085   | 65.0  |
|            | MV-LIML     | 0.4     | 0.339  | 0.199 | 0.165   | 58.0  |
|            |             | 0.6     | 0.297  | 0.191 | 0.093   | 77.1  |
|            | MV-IVW-PCA  | -       | 0.297  | 0.132 | 0.119   | 69.3  |
|            | MV-LIML-PCA | -       | 0.347  | 0.155 | 0.131   | 74.1  |
| $\theta_2$ | MV-IVW      | 0.4     | -0.013 | 0.170 | 0.149   | 8.0   |
|            |             | 0.6     | -0.012 | 0.136 | 0.085   | 18.7  |
|            | MV-LIML     | 0.4     | -0.009 | 0.198 | 0.165   | 7.8   |
|            |             | 0.6     | -0.002 | 0.189 | 0.093   | 27.8  |
|            | MV-IVW-PCA  | -       | -0.014 | 0.134 | 0.119   | 7.8   |
|            | MV-LIML-PCA | -       | -0.007 | 0.160 | 0.131   | 9.6   |
| $\theta_3$ | MV-IVW      | 0.4     | -0.487 | 0.169 | 0.148   | 86.8  |
|            |             | 0.6     | -0.355 | 0.135 | 0.085   | 93.2  |
|            | MV-LIML     | 0.4     | -0.529 | 0.193 | 0.164   | 87.5  |
|            |             | 0.6     | -0.459 | 0.189 | 0.093   | 95.7  |
|            | MV-IVW-PCA  | -       | -0.478 | 0.132 | 0.119   | 95.6  |
|            | MV-LIML-PCA | -       | -0.538 | 0.154 | 0.131   | 96.7  |

Mean estimates, standard deviation (SD) of estimates, mean standard error (mean SE) of estimates, and empirical power of the 95% confidence interval to estimate  $\theta_1 = 0.4$ ,  $\theta_2 = 0$ , and  $\theta_3 = -0.6$ .
